# Supplementary material for: Effects of Dietary Protein Intake on Cutaneous and Systemic Inflammation in Mice with Acute Experimental Psoriasis
Source: MDPI journal article supplement (doi:10.3390/nu13061897), 2021-05-31
Supplement: s1 [file s1]

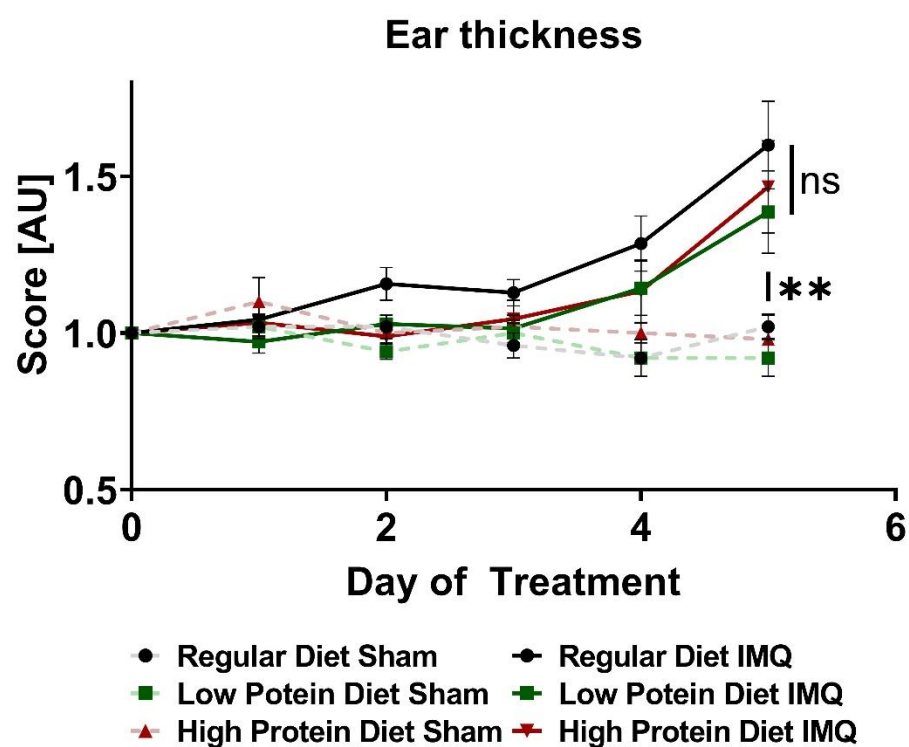

Figure S1. Modulating dietary protein does not affect skin thickness in IMQ-induced psoriasis-like skin disease. Quantification of ear thickness during sham or IMQ-treatment in the different dietary groups (n = 8–13; 2-way ANOVA).

A)

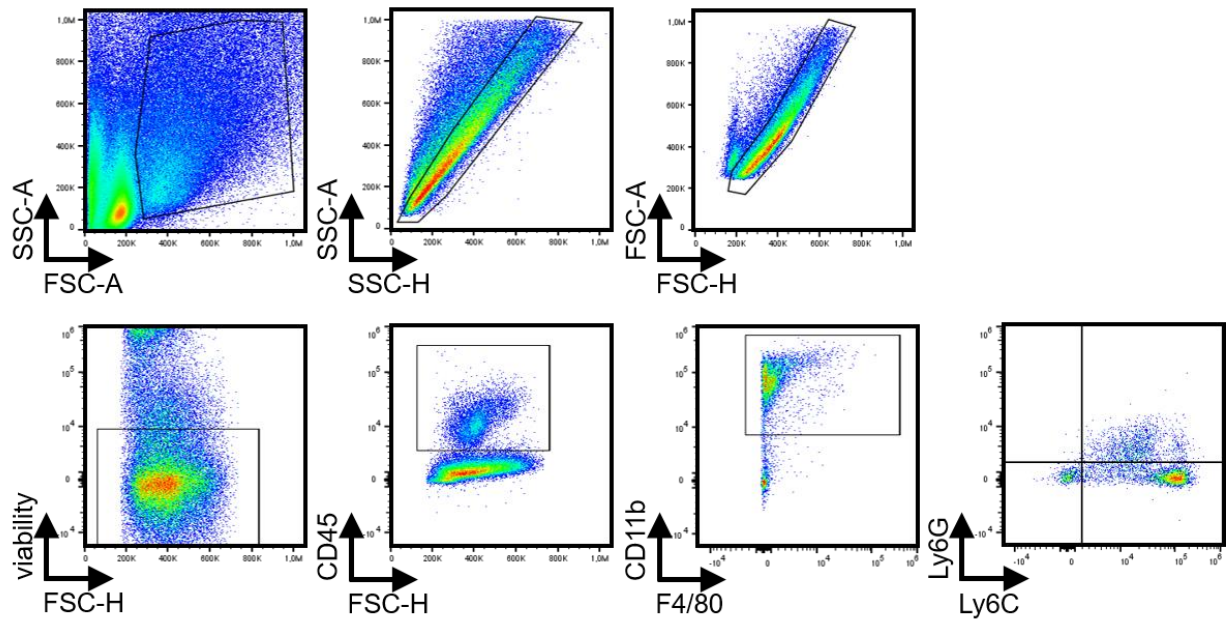

B)

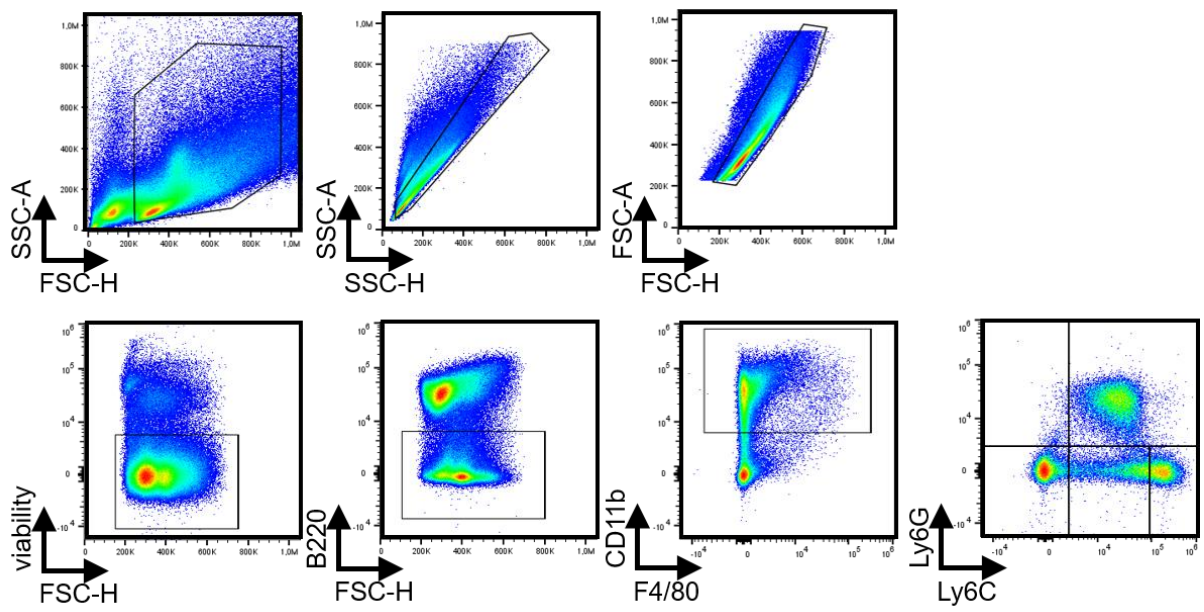

Figure S2. Gating strategy of ear (A) and spleen (B).
